RESEARCH ARTICLE

# Proteomic analysis in the Dufour's gland of Africanized *Apis mellifera* workers (Hymenoptera: Apidae)

Aparecida das Dores Teixeira<sup>1</sup>, Patricia D. Games<sup>1</sup>, Benjamin B. Katz<sup>2</sup>, John M. Tomich<sup>2</sup>, José C. Zanuncio<sup>3</sup>, José Eduardo Serrão<sup>1\*</sup>

**1** Department of General Biology, Universidade Federal de Viçosa, Viçosa, Minas Gerais, Brazil, **2** Biotechnology Core Facility and Department of Biochemistry and Molecular Biophysics, Kansas State University, Manhattan, Kansas, United States of America, **3** Department of Entomology, Universidade Federal de Viçosa, Viçosa, Minas Gerais, Brazil

☞ These authors contributed equally to this work.

\* [jeserrao@ufv.br](mailto:jeserrao@ufv.br)

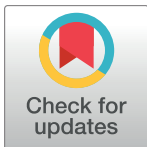

**OPEN ACCESS**

**Citation:** Teixeira AdD, Games PD, Katz BB, Tomich JM, Zanuncio JC, Serrão JE (2017) Proteomic analysis in the Dufour's gland of Africanized *Apis mellifera* workers (Hymenoptera: Apidae). PLoS ONE 12(5): e0177415. <https://doi.org/10.1371/journal.pone.0177415>

**Editor:** Stephen J. Martin, University of Salford, UNITED KINGDOM

**Received:** February 6, 2017

**Accepted:** April 26, 2017

**Published:** May 24, 2017

**Copyright:** © 2017 Teixeira et al. This is an open access article distributed under the terms of the [Creative Commons Attribution License](https://creativecommons.org/licenses/by/4.0/), which permits unrestricted use, distribution, and reproduction in any medium, provided the original author and source are credited.

**Data Availability Statement:** All relevant data are within the paper and its Supporting Information file.

**Funding:** This study was supported by Brazilian research agencies CNPq and FAPEMIG. These funder supplied grants for usage in reagents. All the funders had no role in study design, data collection and analysis, decision to publish, or preparation of the manuscript.

**Competing interests:** The authors have declared that no competing interest exist.

## Abstract

The colony of eusocial bee *Apis mellifera* has a reproductive queen and sterile workers performing tasks such as brood care and foraging. Chemical communication plays a crucial role in the maintenance of sociability in bees with many compounds released by the exocrine glands. The Dufour's gland is a non-paired gland associated with the sting apparatus with important functions in the communication between members of the colony, releasing volatile chemicals that influence workers roles and tasks. However, the protein content in this gland is not well studied. This study identified differentially expressed proteins in the Dufour's glands of nurse and forager workers of *A. mellifera* through 2D-gel electrophoresis and mass spectrometry. A total of 131 spots showed different expression between nurse and forager bees, and 28 proteins were identified. The identified proteins were categorized into different functions groups including protein, carbohydrate, energy and lipid metabolisms, cytoskeleton-associated proteins, detoxification, homeostasis, cell communication, constitutive and allergen. This study provides new insights of the protein content in the Dufour's gland contributing to a more complete understanding of the biological functions of this gland in honeybees.

## Introduction

Bees play a key role in agriculture and global ecosystems, pollinating plants in native areas as well as high value agricultural crops [1, 2]. They have different levels of social behavior, from solitary to eusocial, whose colony has a reproductive queen and thousands of sterile or semi-sterile workers, performing all other tasks for colony maintenance [3–5].

The honeybee *Apis mellifera* (Hymenoptera: Apidae) is a eusocial insect with a remarkable labor division [6]. Until two-three weeks of age, adult workers perform tasks inside the nest, including brood care and are named nurses [5]. After this period, the workers perform tasks

out of colony including water, nectar, pollen and/or resin collection and are named foragers [5].

The social organization of the bees is maintained by a complex communication system that involves the pheromones release by various exocrine glands [6]. Among the exocrine gland of the bees, are those attached to the sting apparatus, including venom and Dufour's glands [7]. The venom gland originates from glands associated with the ovipositor of ancestors Hymenoptera, whereas the Dufour's gland is homologous to the lateral glands of other insects [8, 9].

A set of functions has been attributed to the Dufour's gland secretion in different Hymenoptera, such as lining brood cells, nest building, larval feeding, in addition to its role in communication including hosts marker, nest and nest-mate recognition, fertility sign, trail [10], alarm [11] and sexual pheromones [12, 13]. Although the main compounds released by Dufour's gland have been characterized as volatiles [10, 11], the proteins present in the gland remains poorly studied.

The objective of this study was to characterize those proteins expressed differentially in the Dufour's gland of nurse and forager workers of *A. mellifera*, contributing with new data for the comprehension of the biological functions of this gland in the labor division.

## Materials and methods

### Biological samples

Africanized *Apis mellifera* were collected from Central Apiary of the Universidade Federal de Viçosa, Viçosa, Minas Gerais, Brazil (20° 45' S 42° 52' W). For this study, we analyzed 400 workers randomly collected from six colonies and in different dates. Two hundred nurse workers were collected in the brood areas inside the nest and 200 forager ones were collected in the nest entrance with pollen grains loaded in their hind legs. Nurse and forager workers were cryo-anesthetized, dissected and their Dufour's glands were removed and stored in 1% (v/v) aqueous solution of protease inhibitors (Sigma P2714) at -20°C until use.

According Brazilian laws there is no need for ethical requirements for studies on invertebrates.

### Protein extraction

The samples of Dufour's glands were dried using a Speed Vac concentrator (Concentrator Plus 5305, Eppendorf, Hamburg, Germany) and resuspended in 100 µL of lysis buffer (7 M urea, 2 M thiourea, 4% (w/v) 3-[(3-Cholamidopropyl) dimethylammonio]-1-propanesulfonate (CHAPS), and 40 mM dithiothreitol (DTT). Then, the samples immersed in an ice bath were submitted to successive ultrasound pulses (2 min) centrifuged at 15,000 x g for 30 minutes at 4°C and the supernatant collected. Total protein concentration was determined according to Bradford assay [14] using BSA as a standard.

### Two-dimensional electrophoresis and image acquisition

The samples were loaded onto immobilized pH gradient (IPG) strips (linear pH 3–10, 7 cm, GE Healthcare, USA). The strips were rehydrated for 12 h in 125 µL of rehydration solution (DeStreak—GE Healthcare, USA) containing 150 µg protein, 2% (v/v) ampholyte pH 3–10 (GE Healthcare) and 40 mM DTT. Isoelectric focusing (IEF) was performed in Ettan IPGphor III apparatus (GE Healthcare) at 20°C, with a maximum current of 50 mA/strip for approximately 14 h using the following program: 12 h at 300 V, 1000 V for 30 min, 5000 V for 80 min and 5000 V for 25 min. The IPG strips were first equilibrated in 5 mL equilibration buffer I [75 mM Tris-HCl, pH 8.8, 6 M urea, 25.5% (v/v) glycerol, 2% (w/v) sodium dodecyl sulfate (SDS),

0.002% (w/v) bromophenol blue and 1% (w/v) DTT] for 15 min and later in 5 mL equilibration buffer II [75 mM Tris-HCl, pH 8.8, 6 M urea, 25.5% (v/v) glycerol, 2% (w/v) sodium dodecyl sulfate (SDS), 0.002% (w/v) bromophenol blue and 2.5% (w/v) iodoacetamide] for 15 min. After equilibration, the strips were transferred to an SDS-polyacrylamide, 14% separating gel in Mini-PROTEAN Tetra cell (Bio-Rad, USA). The electrophoresis was performed at 100 V for 40 min and 60 V until the dye front reached the bottom of the gel. Gels were fixed in 40% (v/v) methanol with 10% (v/v) acetic acid for 30 min, washed in water, and stained with staining solution [0.8% (v/v) phosphoric acid, 20% (v/v) methanol, 8% (w/v) ammonium sulfate and 0.08% (w/v) Coomassie Brilliant Blue G-250 for 36 h. After this time, the gels were stored in solution containing 5% (v/v) acetic acid.

For each nurse or forager workers were carried out three gels, representing a triplicate.

The gels were digitized with Image Scanner III (GE Healthcare) at 16 bit and 600 dpi resolution. The images were analyzed using Image Master 2D Platinum 7.0 software (GE Healthcare, USA). ANOVA was carried out a threshold of  $p \leq 0.05$ , and those spots with  $\geq 1.2$ -fold change in average spot volume between nurse and forager workers were used for the mass spectrometry analyses.

### In-gel extraction and trypsin digestion of proteins for MALDI analysis

The differentially expressed spots in the Dufour's gland of *A. mellifera* nurse and forager workers were manually excised from each gel and transferred to 0.6 mL microcentrifuge tubes containing solution of 50% (v/v) acetonitrile (ACN) and 25 mM ammonium bicarbonate ( $\text{NH}_4\text{HCO}_3$ ). The samples were washed 1–4 times in this last solution until the gel pieces become translucent white. The gel slices were dehydrated for 5 min with 100% (v/v) ACN twice and dried at Speed Vac. Dried gel pieces were reduced with 65 mM DTT in 100 mM  $\text{NH}_4\text{HCO}_3$  for 30 min at 56°C and alkylated with 200 mM iodoacetamide for 30 min in the dark at room temperature. The gel pieces were incubated with 100 mM  $\text{NH}_4\text{HCO}_3$  and rehydrated with 100% (v/v) ACN for 10 min and dried using Speed Vac. Then the gel slices were digested in solution containing 40 mM  $\text{NH}_4\text{HCO}_3$ , 10% (v/v) ACN and 25 ng  $\mu\text{L}^{-1}$  trypsin (Trypsin Gold, Mass Spectrometry Grade, Promega, USA) overnight at 37°C. Peptides were extracted from the gel slices by incubating them with 5% (v/v) formic acid, 50% (v/v) ACN for 15 min. After incubation, gel slices were sonicated, and then the peptide solutions were transferred to a clean tube and dried in the Speed Vac to a final volume of 10  $\mu\text{L}$ . The samples were desalted using a Zip-Tip C18 cartridge (Millipore, USA), dried in the Speed Vac and resuspended in 0.1% (v/v) aqueous trifluoroacetic acid (TFA) for MALDI mass analysis.

### Mass spectrometry and bioinformatics analyses

Desalted peptides samples from Dufour's glands of both nurse and forager workers were mixed with  $\alpha$ -cyano-4-hydroxycinnamic acid matrix [10 mg  $\text{mL}^{-1}$  in 50% (v/v) ACN, 0.1% (v/v) TFA] prepared in 1:1 ratio and the resulting 2  $\mu\text{L}$  was spotted onto the MALDI plate MTP Anchor Chip TM 600/384 TF (Bruker Daltonics, Alemanha). The mass spectrometry (MS) analyses were performed on Ultraflex III MALDI TOF/TOF mass spectrometer (Bruker Daltonics, Germany). Spectra were acquired in the positive-ion reflectron mode with a mass range at 66.7 Hz with a 1000 laser shots added per spectrum. The MS/MS spectra were acquired in LIFT mode and 3000 laser shots. MS and MS/MS spectra were analyzed using FlexAnalysis 3.3 software (Bruker Daltonics, Germany) and calibrated internally with auto-proteolysis peptides of trypsin. All known contaminants (trypsin autoprolysis and known keratin peaks) were excluded during the process. MS/MS spectra were processing using Sort Neaten Assign and Place (SNAP). Spectra were searched against the *A. mellifera* database

(downloaded from uniprot.org, last update April 13, 2015) using the computer program Mascot (Mascot Daemon). Search parameters were as follows: taxonomy, other Metazoa; trypsin cleavage; allow up to one missed cleavage; peptide mass tolerance for MS, 0.5 Da; peptide mass tolerance for MS/MS, 0.2; fixed modification, carbamidomethyl (C); variable modification, oxidation (M). After identification by Mascot, the proteins were validated using Scaffold v.4.0 software. Peptide and Protein Prophet algorithms were used to establish the peptide and protein threshold at 90% respectively, with at least one unique peptide matches required in each sample. Proteins identified and validated were then analyzed using Uniprot database (<http://www.uniprot.org/>) to suggest probable function. Further, all the significant proteins were analyzed using various bioinformatics programme includes CELLO v.2.5 subcellular localization predictor (<http://cello.life.nctu.edu.tw/>), SIGNAL P v.4.1 signal peptide predictor (<http://www.cbs.dtu.dk/services/SignalP/>) and STRING v.10.0 database protein-protein interaction predictor (<http://www.string-db.org/>).

## Results

### Comparative 2D gel electrophoresis

The 2D-electrophoresis profiles obtained from the Dufour's gland of nurse and forager workers of *A. mellifera* revealed 279 spots (Fig 1). The set of ANOVA ( $p < 0.05$ ) analyses detected 131 spots showing differential expression between nurse and forager workers (see S1 Table).

### Mass spectrometry

A total of 80 protein spots from Dufour's glands of *A. mellifera* workers were excised for digestion and mass spectrometry analyses. The MS/MS analyses resulted in the identification of 28 spots with 24 different proteins (Fig 1A and 1B, Table 1).

Proteins in the up-regulated group in nurse workers (a total of 20 proteins identified) included proteins that were more expressed higher in nurse workers compared to forager bees (c.a. 15 proteins) as well as those proteins that were present only in nurse workers (c.a. 5 proteins) (Fig 2, Table 2). These proteins belong to different functional categories playing roles in the metabolisms of protein (spot 1, 23, 26, 36, 37, 61 and 62), carbohydrates (spot 18), energy

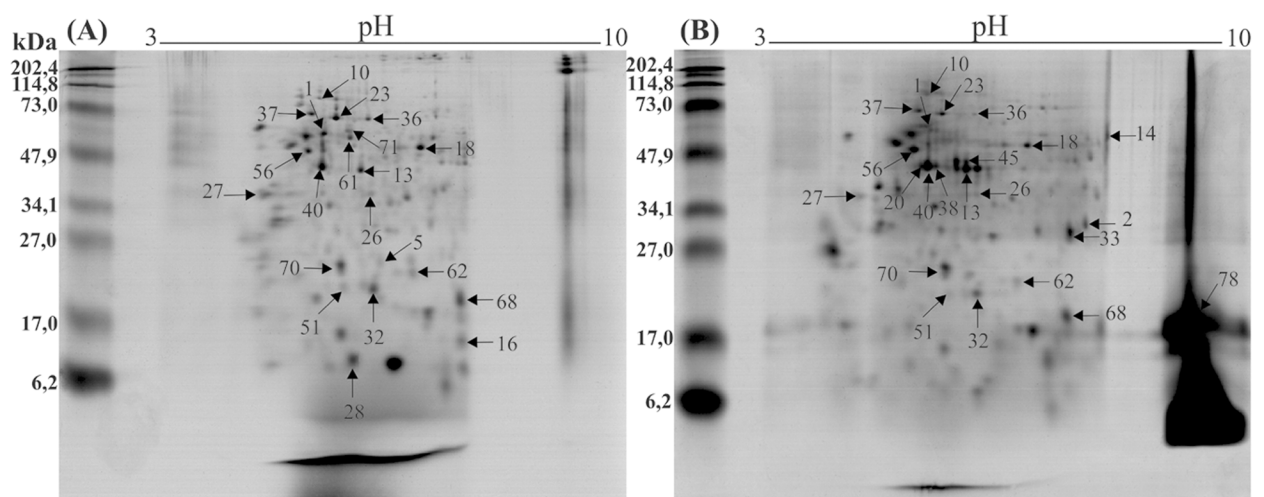

**Fig 1. Representative 2-D electrophoresis proteins profile from Dufour's gland of *Apis mellifera* nurse (A) and forager (B) workers.** All identified proteins by MALDI-TOF/TOF are numbered and spot numbers correspond to Table 1.

<https://doi.org/10.1371/journal.pone.0177415.g001>

**Table 1. List of identified proteins spots in Dufour's glands of *Apis mellifera* nurse and forager workers.**

| Spot number <sup>a</sup> | Accession number | Protein name                                | MM (Da)/pI Experimental | MM (Da)/pI Theoretical | ANOVA <sup>b</sup> | Score <sup>c</sup> |
|--------------------------|------------------|---------------------------------------------|-------------------------|------------------------|--------------------|--------------------|
| 01                       | V9II55_APICE     | Heat Shock protein (HSP60)                  | 57139/5.61              | 60546/5.64             | 0.000059           | 82                 |
| 02                       | A0A088A4K0_APIME | Phosphoglycerate mutase                     | 31688/7.77              | 35396/9.36             | 0.000068           | 156                |
| 05                       | J7F0F7_APICC     | Ferritin                                    | 23473/6.42              | 25718/5.9              | 0.00037            | 79                 |
| 10                       | V9IJ68_APICE     | Transitional endoplasmic reticulum ATPase   | 86885/5.57              | 89467/5.18             | 0.0012524          | 74                 |
| 13                       | A0A088ARZ8_APIME | Arginine kinase                             | 42360/6.16              | 43726/6.11             | 0.0013432          | 414                |
| 14                       | V9II98_APICE     | Chitinase-like protein Idgf4                | 56395/8.13              | 48921/8.06             | 0.0014878          | 162                |
| 16                       | Q76LA4_APIME     | Fatty acid binding protein                  | 10636/7.66              | 15140/6.37             | 0.0021074          | 61                 |
| 18                       | A0A088AST9_APIME | Enolase                                     | 49088/7.10              | 39821/6.54             | 0.0024789          | 336                |
| 20                       | V9IE14_APICE     | Actin-42A                                   | 45085/5.27              | 42121/5.3              | 0.004775           | 169                |
| 23                       | V9IEZ2_APICE     | Heat shock protein (HSP70)                  | 65541/5.80              | 71383/5.43             | 0.0052428          | 504                |
| 26                       | A0A088ATC7_APIME | Proteasome subunit alpha type               | 36131/6.31              | 31250/5.78             | 0.0063259          | 56                 |
| 27                       | A0A088AJH1_APIME | Annexin                                     | 35612/4.53              | 36088/4.6              | 0.0072667          | 108                |
| 28                       | Q1W641_APIME     | Odorant Binding Protein 13 (OBP13)          | 7873/5.95               | 15494/6.37             | 0.0090299          | 123                |
| 32                       | G0WRL1_APICC     | thioredoxin peroxidase 1(Tpx-1)             | 20221/5.82              | 22065/6.31             | 0.0111726          | 106                |
| 33                       | L0HT99_APICE     | Actin (Fragment)                            | 30141/7.54              | 31458/4.94             | 0.01178530         | 41                 |
| 36                       | V9IK10_APICE     | Stress-70 protein (HSP70)                   | 65221/6.30              | 75642/6.38             | 0.0132579          | 114                |
| 37                       | V9IGA1_APICE     | Glucose-regulated protein (HSP70)           | 68495/5.44              | 72878/5.29             | 0.0136561          | 298                |
| 38                       | V9IE14_APICE     | Actin-42A                                   | 44934/5.51              | 42121/5.3              | 0.0138284          | 94                 |
| 40                       | V9IE14_APICE     | Actin-42A                                   | 43919/5.57              | 42121/5.3              | 0.0230893          | 253                |
| 45                       | ACPH1_APIME      | Venom acid phosphatase AcpH-1               | 46005/5.99              | 45588/5.63             | 0.025984           | 135                |
| 51                       | V9IJF3_APICE     | Glutathione S-transferase                   | 22562/5.81              | 22997/5.49             | 0.0312186          | 245                |
| 56                       | A0A088AMB8_APIME | ATP synthase subunit beta                   | 48372/5.37              | 55096/5.25             | 0.0384374          | 471                |
| 61                       | A0A088A7Y2_APIME | Protein disulfide-isomerase                 | 55213/6.05              | 6220/5.57              | 0.0423643          | 157                |
| 62                       | V9IG54_APICE     | Protein lethal(2)essential for life (HSP20) | 21819/6.93              | 21882/6.32             | 0.0447684          | 86                 |
| 68                       | I1VC86_APIME     | Phospholipase A2                            | 18400/7.66              | 19585/7.05             | 0.0200282          | 50                 |
| 70                       | V9IJF3_APICE     | Glutathione S-transferase                   | 23544/5.80              | 22997/5.49             | 0.0152591          | 141                |
| 71                       | A0A088A9C4_APIME | Carboxylic ester hydrolase                  | 59133/5.97              | 59330/5.55             | 0.0173495          | 139                |
| 78                       | I1VC86_APIME     | Phospholipase A2                            | 18302/9.30              | 19585/7.05             | 0.0219103          | 107                |

<sup>a</sup>Spot numbers as in 2D reference gel (see Fig 1).

<sup>b</sup>ANOVA values from Image Master software.

<sup>c</sup>Mascot scores; Individual ions scores > 27 indicate identity or extensive homology (p<0.05).

<https://doi.org/10.1371/journal.pone.0177415.t001>

(spots 10, 13 and 56), and lipid (spots 16, 68 and 71), detoxification (spots 32, 51 and 70), homeostasis (spot 5), constituent protein (spot 27) and cell communication (spot 28) (Fig 2A, Table 2).

Proteins down-regulated group in nurse workers (a total of eight proteins identified), included those proteins with lower expression levels in the nurse workers in relation to forager ones (c.a. one protein) as well as those different proteins presents only in forager workers (c.a. five proteins) (Table 2). These proteins have been classified into carbohydrate (spot 2 and 14) and lipid (78) metabolisms, cytoskeleton-associated proteins (spots 20, 33, 38 and 40) and allergen (spot 45) (Fig 2B, Table 2).

### Subcellular localization and signal peptide

Data on subcellular localization and the presence of signal peptide in the identified proteins were evaluated taking into account secretory function of Dufour's gland (Fig 3, Table 2). Most

**(A) Up-regulated proteins in nurse workers**

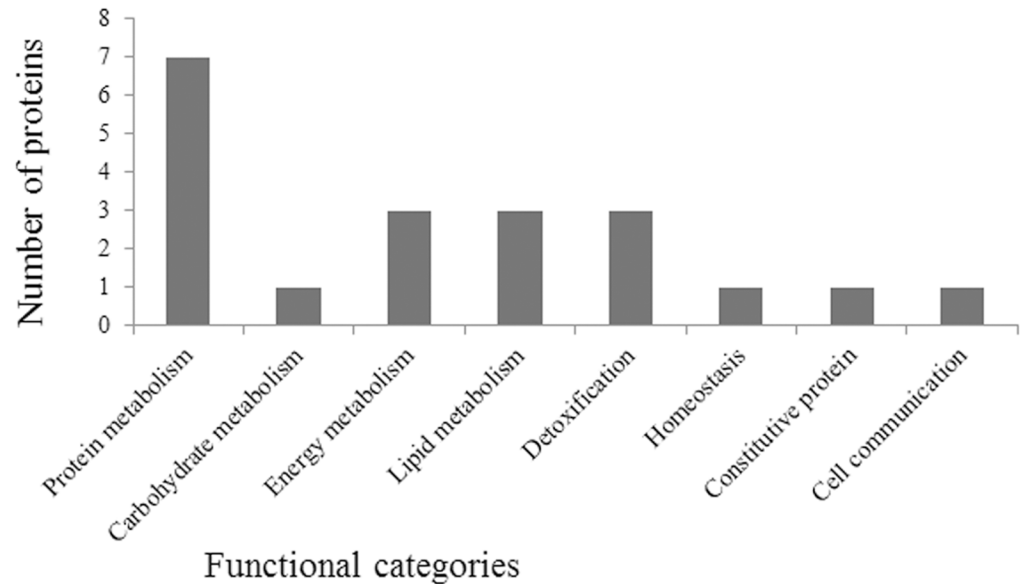

**(B) Down-regulated proteins in nurse workers**

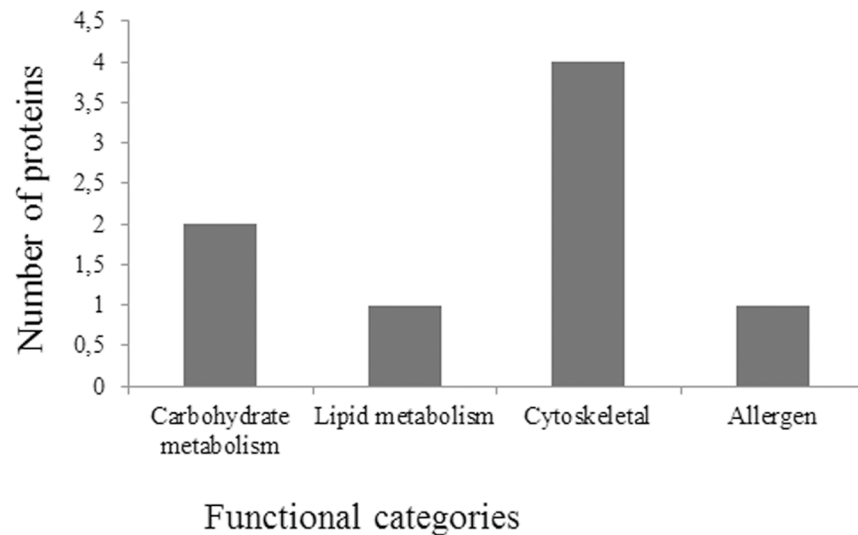

**Fig 2. Identified proteins from Dufour's gland of *Apis mellifera* workers.** Up-regulated (A) and down-regulated (B) proteins in nurse workers. Classification into functional categories was obtained from the Uniprot database.

<https://doi.org/10.1371/journal.pone.0177415.g002>

of the identified proteins (c.a. 57%) showed cytoplasmic subcellular localization (Fig 3A) and a small group (c.a. 25%) of the proteins contained signal peptides (Fig 3B).

**Interaction of expressed proteins**

Protein-protein predicted functional interactions were assessed to obtain additional information about the functions of the protein of the Dufour's gland in *A. mellifera* workers (Fig 4).

Most of the up-regulated proteins of Dufour's gland of nurse workers showed functional interactions among them: heat shock protein (LOC409384), transitional endoplasmic

**Table 2. List of identified proteins spots in Dufour's glands of *Apis mellifera* workers with their fold expression values, functional categories, sub-cellular localization and signal peptide analyses.**

| Spots number <sup>a</sup> | Protein name                                | Expression | Fold change <sup>b</sup> | Functional categories   | Subcellular localization   | Signal peptide |
|---------------------------|---------------------------------------------|------------|--------------------------|-------------------------|----------------------------|----------------|
| 01                        | Heat Shock protein (HSP60)                  | Up         | 16.49                    | Protein metabolism      | Cytoplasmic                | No             |
| 23                        | Heat shock protein (HSP70)                  | Up         | 7.41                     | Protein metabolism      | Cytoplasmic                | No             |
| 26                        | Proteasome subunit alpha type               | Up         | 5.21                     | Protein metabolism      | Cytoplasmic/nucleus        | No             |
| 36                        | Stress-70 protein (HSP70)                   | Up         | 9.92                     | Protein metabolism      | Mitochondria               | No             |
| 37                        | Glucose-regulated protein (HSP70)           | Up         | 2.93                     | Protein metabolism      | Endoplasmic reticulum      | No             |
| 61                        | Protein disulfide-isomerase                 | Up         | ∞                        | Protein metabolism      | Endoplasmic reticulum      | Yes            |
| 62                        | Protein lethal(2)essential for life (HSP20) | Up         | 2.89                     | Protein metabolism      | Mitochondria / Cytoplasmic | No             |
| 02                        | Phosphoglycerate mutase                     | Down       | ∞                        | Carbohydrate metabolism | Cytoplasmic                | No             |
| 14                        | Chitinase-like protein Idgf4                | Down       | ∞                        | Carbohydrate metabolism | Extracellular              | Yes            |
| 18                        | Enolase                                     | Up         | 4.70                     | Carbohydrate metabolism | Cytoplasmic                | No             |
| 10                        | Transitional endoplasmic reticulum ATPase   | Up         | 2.46                     | Energy metabolism       | Endoplasmic reticulum      | No             |
| 13                        | Arginine kinase                             | Up         | 1.84                     | Energy metabolism       | Cytoplasmic                | No             |
| 56                        | ATP synthase subunit beta                   | Up         | 1.54                     | Energy metabolism       | Mitochondria               | No             |
| 16                        | Fatty acid binding protein                  | Up         | ∞                        | Lipid metabolism        | Cytoplasmic                | No             |
| 68                        | Phospholipase A2                            | Up         | 2.62                     | Lipid metabolism        | Extracellular              | Yes            |
| 71                        | Carboxylic ester hydrolase                  | Up         | ∞                        | Lipid metabolism        | Cytoplasmic                | No             |
| 78                        | Phospholipase A2                            | Down       | ∞                        | Lipid metabolism        | Extracellular              | Yes            |
| 20                        | Actin-42A                                   | Down       | ∞                        | Cytoskeletal            | Cytoplasmic                | No             |
| 33                        | Actin (Fragment)                            | Down       | ∞                        | Cytoskeletal            | Cytoplasmic                | No             |
| 38                        | Actin-42A                                   | Down       | ∞                        | Cytoskeletal            | Cytoplasmic                | No             |
| 40                        | Actin-42A                                   | Down       | 3.49                     | Cytoskeletal            | Cytoplasmic                | No             |
| 32                        | Thioredoxin peroxidase 1 (TPX protein)      | Up         | 3.23                     | Detoxification          | Cytoplasmic                | No             |
| 51                        | Glutathione S-transferase                   | Up         | 1.67                     | Detoxification          | Cytoplasmic                | No             |
| 70                        | Glutathione S-transferase                   | Up         | 4.79                     | Detoxification          | Cytoplasmic                | No             |
| 05                        | Ferritin                                    | Up         | ∞                        | Homeostasis             | Extracellular              | Yes            |
| 27                        | Annexin                                     | Up         | 3.16                     | Constitutive protein    | Cytoplasmic                | No             |
| 28                        | Odorant Binding Protein 13 (OBP13)          | Up         | ∞                        | Cell communication      | Extracellular              | Yes            |
| 45                        | Venom acid phosphatase Acph-1               | Down       | ∞                        | Allergen                | Extracellular              | Yes            |

<sup>a</sup>Spot numbers as in 2D reference gel (see Fig 1).

<sup>b</sup>Fold change is the ratio between average normalized volume of each protein in nurse workers that of the corresponding spot in forager ones gel. ∞ = means that spots of the all replicates are presents only in nurse or forager workers.

<https://doi.org/10.1371/journal.pone.0177415.t002>

reticulum ATPase (TER94), enolase (LOC552678), heat shock protein (Hsc70-4), proteasome subunit alpha type (LOC552654), thioredoxin peroxidase 1 (Tpx-1), stress-70 protein (Hsc70-5), glucose-regulated protein (Hsc70-3), ATP synthase subunit beta (Atp5b), protein lethal (2) essential for life (LOC410087), protein disulfide-isomerase (ERp60) and ferritin (Fer1HCH) (Fig 4A).

The heat shock protein (LOC409384) exhibited functional interactions with most of the protein interaction network, but there was a predominance of stronger interactions with the glucose-regulated protein (Hsc70-3), heat shock protein (Hsc 70–4) and stress protein-70

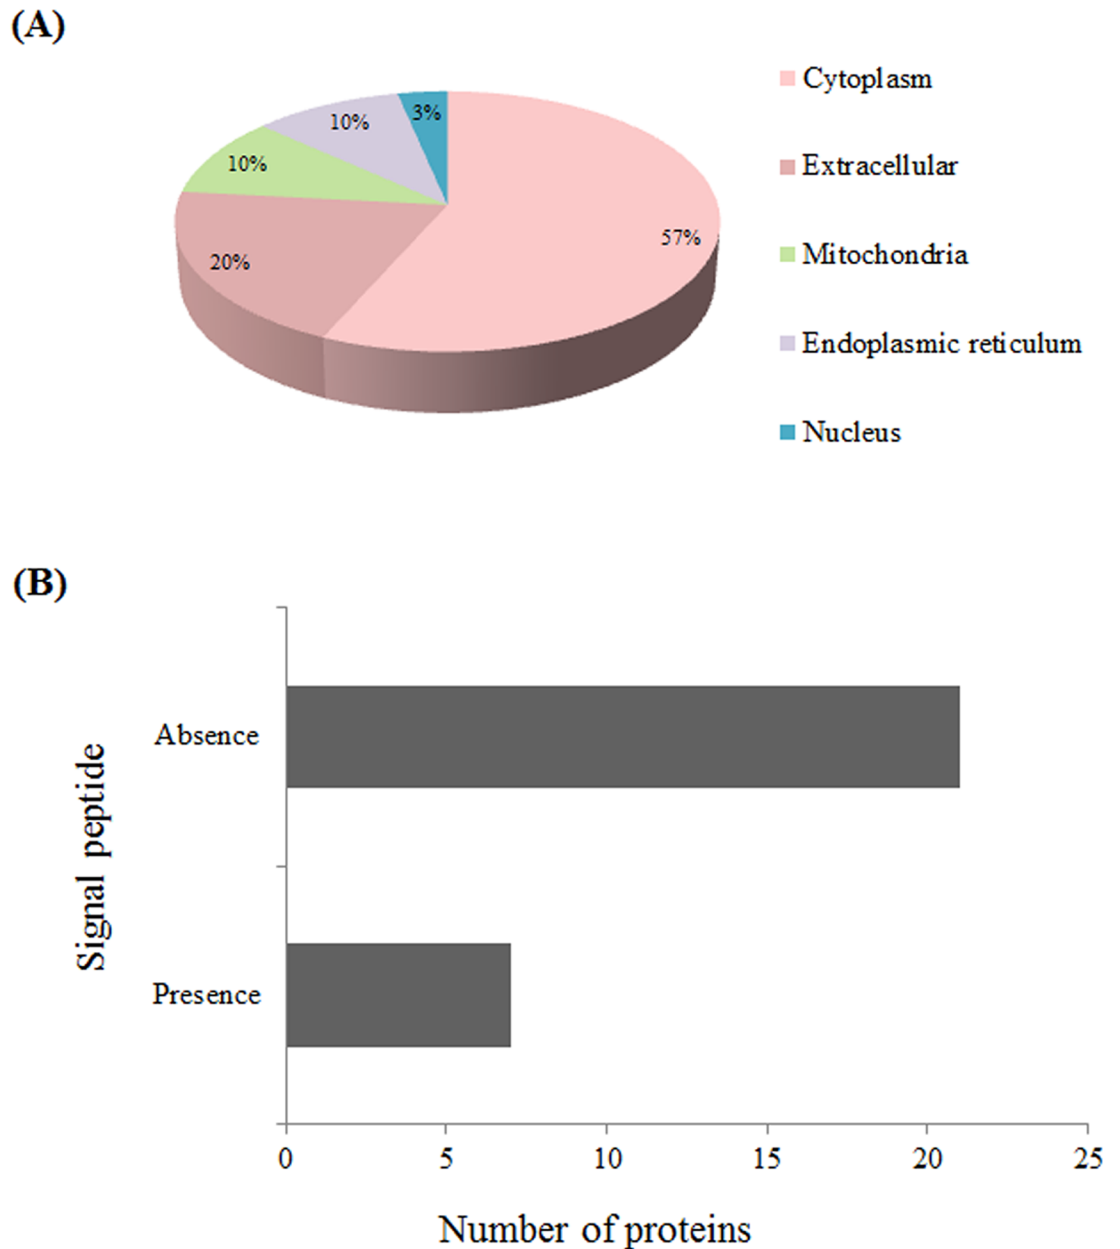

**Fig 3. Identified proteins from Dufour's gland of *Apis mellifera* workers.** (A) Classification into subcellular localizations obtained from the CELLO v.2.5 subcellular localization predictor. (B) Peptide signal presence obtained from the SIGNAL P v.4.1.

<https://doi.org/10.1371/journal.pone.0177415.g003>

(Hsc70-5), all them a family of heat shock proteins (HSPs), besides of interaction with ATP synthase subunit beta (Atp5b) (Fig 4A).

The thioredoxin peroxidase 1 (Tpx-1) exhibited strong functional interactions with the protein disulfide isomerase (ERp60), which in turn showed interactions with heat shock proteins (Hsc70-3 and Hsc70-4) (Fig 4A). In addition, Tpx-1 interacted weakly with ferritin (Fer1HCH).

All down-regulated proteins in Dufour's gland of nurse workers including chitinase-like protein Idgf4-like (LOC413324), phosphoglycerate mutase (LOC552736), actin fragment



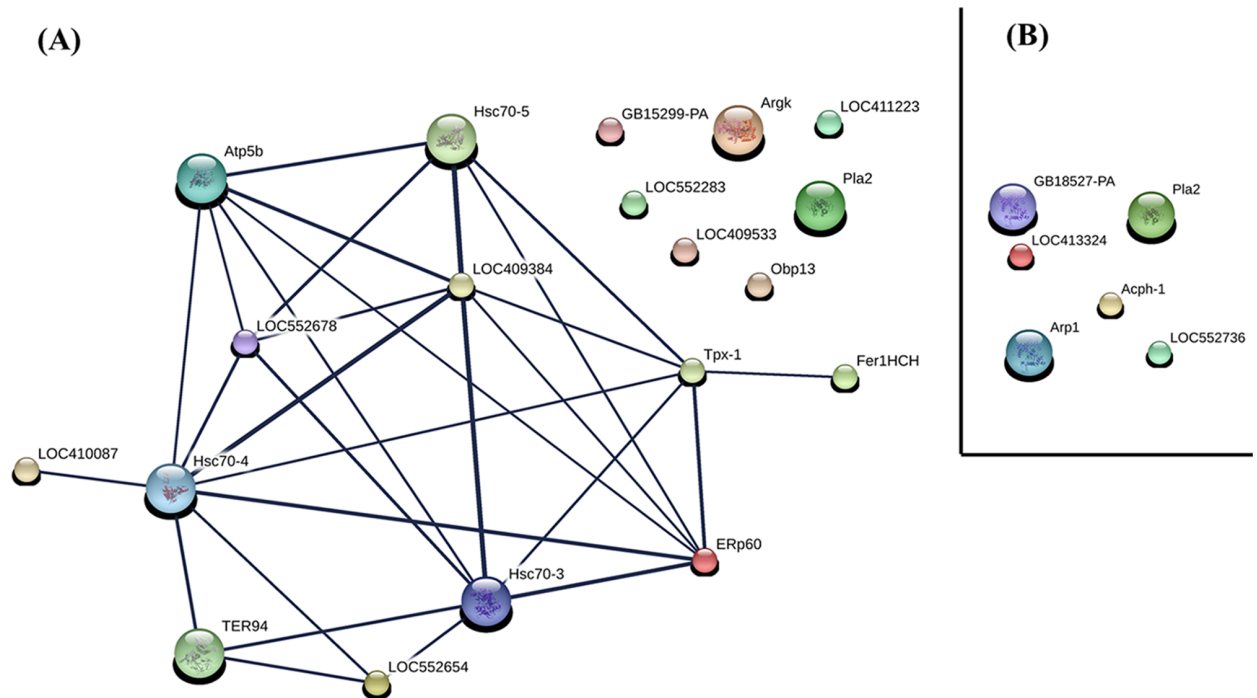

**Fig 4. Protein-protein interactions of the identified proteins from Dufour's gland of *Apis mellifera* workers.** Up-regulated (A) and down-regulated (B) proteins in nurse workers in comparison with forager ones. Proteins were analyzed using the STRING database. The numbers correspond to the protein accession numbers in the Uniprot database and are described in the text. The interactions networks are shown in the confidence view where thicker and thinner lines represent the stronger and weaker interactions, respectively.

<https://doi.org/10.1371/journal.pone.0177415.g004>

(GB18527-PA), actin 42A (Arp 1), phospholipase A2 (Pla2) and venom acid phosphatase AcpH-1 (AcpH-1) showed no functional interactions among themselves (Fig 4B).

### Discussion

All of the proteins identified that exhibited activity in protein metabolism showed different levels in the Dufour's gland of nurse workers of *A. mellifera* such as heat shock proteins (HSPs) superfamily: heat shock protein (HSP60), heat shock protein (HSP70), stress-70 protein (HSP70), glucose-regulated protein (HSP70) and protein lethal (2) essential for life (HSP20). On the other hand, protein disulfide isomerase was expressed solely in the Dufour's gland of nurse workers. Molecular chaperones and proteases are required to the normal functionality of proteins in a living cell showing synthesis/degradation activities [15], controlling the balance between native folded functional proteins and aggregation-prone misfolded or invalidated proteins [16]. To this effect, proteins involved in configuration of nascent peptide chains are expressed as heat shock proteins (HSPs) and protein disulfide-isomerase. In addition, proteins with degradative function [17] such as the proteasome subunit alpha type are also required to keep this balance.

In honeybees, HSPs are induced at high temperatures [18], under pathogenic infections conditions [19, 20] and processes of embryogenesis [21].

The protein lethal (2) essential for life in *A. mellifera* is up-regulated in the brain of forager workers [22, 23] and seems play some role during bee aging. However, the function of this protein in the Dufour's gland of *A. mellifera* workers needs further studies.

All proteins discussed above are functionally related among themselves (see Fig 4A) and seem play some role in protein metabolism of Dufour's gland. Although most of the secreted products released by Dufour's gland of the bees are lipids [24, 25], these proteins may be involved in the metabolism of other proteins, with their metabolic products used in the production of hydrocarbons, alcohols and esters, which have been reported in isolated secretions of this gland from nurse workers [26–29].

Within proteins of the carbohydrate metabolism family, phosphoglycerate mutase and chitinase-like protein Idgf4 were found only in the Dufour's gland of forager workers, whereas enolase was more expressed in nurse ones. Both phosphoglycerate mutase and enolase are involved in the glucose oxidation [30, 31] which is the major energy substrate for various tissues of bees [32, 33]. The chitinase-like protein Idgf4 is an imaginal disc growth factors, related to chitinase, but unlike these, chitinase-like protein Idgf4 has not hydrolase activity [34]. In *A. mellifera*, Idgf4 has been reported to act in the larval development [35, 36] and it seems to be released and transported to target tissues via insect hemolymph [37].

The abundance of these energy conversion proteins from carbohydrate in the Dufour's glands of forager (phosphoglycerate mutase) and nurse (enolase) workers, suggests that this gland in both workers have an important function in cellular processes with high energy consumption, showing that Dufour's gland remains active throughout the bee lifespan [38]. The function of the chitinase-like protein Idgf4 found only in the Dufour's gland of forager workers remains unknown.

Proteins of energy metabolism as arginine kinase, ATP synthase subunit beta and transitional endoplasmic reticulum ATPase were more highly expressed in Dufour's gland of nurse workers. Arginine kinase has been reported to be both a cytoplasmic and mitochondrial protein in arthropods [39, 40] and is up-regulated in *Apis cerana cerana* workers under biotic and abiotic stresses [41] while ATP synthase subunit beta, in addition to its role energy production, has been reported to act as a lipophorin binding protein, the main lipoprotein in the circulation of the insects [42], which cycles among peripheral tissues to exchange its lipid cargo at the plasma membrane of target cells [43]. The transitional endoplasmic reticulum ATPase, in turn, has been characterized as key mediator involved in ER-associated degradation (ERAD), a major quality control process in the protein secretory pathway [44, 45].

These enzymes may function in high energy reactions required for the transport of substances from the hemolymph, which mediates chemical exchanges among tissues and organs, besides to serving in water storage [46, 47] or even modifying compounds in the gland cells prior their release into the gland lumen. The morphology of cells in the Dufour's gland of queens and workers honeybees, suggest that they are able to uptake substances from hemolymph, as circulating fatty acids [25, 48–51], which may be used as substrates in the production of hydrocarbons and esters found in the Dufour's gland secretions [26–29, 52, 53].

The presence of proteins involved in lipid metabolism include fatty acid binding protein and hydrolase carboxylic ester, present only in nurse workers, and phospholipase A2, present in both nurse as forager in Dufour's gland of *A. mellifera* is logical because the principal products released by the gland are lipid-based compounds [24, 25, 52, 53].

Fatty acid binding proteins transfer fatty acids for cell membranes and mediate the effect of fatty acids on gene expression in different tissues [54] while carboxylic ester hydrolases catalyze the hydrolysis of an ester bond resulting in the formation of an alcohol and a carboxylic acid [55]. In addition, phospholipases A2 (Pla2s) catalyze the hydrolysis of the sn-2 acyl glycerophospholipid releasing free fatty acids and lysophospholipids [56]. All proteins described above seem be involved in the production of lipids compound and its precursors found in the Dufour's gland secretion in honey bees [26–29, 52, 53].

A hypothetical model has been suggested for esters production in Dufour's gland of queens and workers of *A. mellifera*, in which esters are synthesized by the elongation of fatty acids into long chain acyl groups, following by their conversion to alcohols and subsequent esterification by acyl-CoAs [57–59]. Eicosanol, an alarm pheromone [28, 60] from workers may be an intermediate in the secretory pathway of esters in the Dufour's gland [59]. In the presence of the queen, this secretory pathway is stopped, and the workers produce only precursor esters, but in queenless colonies, this route proceeds to esters [59]. This may explain the increase in the expression of lipid metabolism proteins in Dufour's gland of nurse workers that potentially may lay eggs in the absence of the queen [61, 62] since the secretion of this gland has been reported to be related to the reproductive status of eusocial bees [59].

The detoxification and oxidative stress proteins, thioredoxin peroxidase-1 (Tpx-1) and glutathione S-transferase (GST) were up-regulated in Dufour's gland of nurse workers. These proteins are functionally related (see Fig 4A), degrading potentially harmful substances such as reactive oxygen species and acting in the detoxification of endogenous and xenobiotic compounds [63, 64]. They are also important in intercellular transport, hormone biosynthesis and insect resistance to insecticides [65, 66]. In adult worker bees, GSTs have been reported in the muscle, brain, fat body, epidermis, midgut, and fat body [67] and venom [68].

The up-regulation of these detoxification proteins in nurse workers, may be due to the higher metabolic activity of Dufour's gland than in forager ones, because the cell metabolism results in the production of reactive oxygen species that are toxic for cells [69].

Ferritin was expressed only in the Dufour's gland of nurse worker. This protein transport iron ions contributing to cell homeostasis [70]. Furthermore, it seems to play role in detoxification process in some insects [71], sharing biological functions with Tpx-1 (see Fig 4A). Studies on insect ferritins revealed that most insects have abundant ferritin in the hemolymph and in the secretory pathways of the cells [72]. Its high expression in Dufour's gland of *A. mellifera* nurse workers is not clear.

Odorant binding protein OBP-13 plays important role in chemical communication in insects [73]. The genome of *A. mellifera* predict 21 OBPs (OBP 1–21) [74, 75], which are small water soluble molecules, binding reversibly to messenger molecules such as pheromones that are generally hydrophobic molecules with low solubility [76, 77]. Although OBPs are commonly expressed in sensory organ of insects such as gustatory and olfactory sensilla [77], they have been also reported in ovary, brain, tegument [74, 78], mandibular gland [79], hemolymph [37] and head salivary gland [80] of social bees. In the present work, OBP-13 was up-regulated in the Dufour's gland of younger nurse workers similarly to that previously reported to *A. mellifera* which OBP-13 expression is caste and age regulated, with high expression in younger workers [81]. Its high expression in nurse workers may be associated with increased production of pheromones by the Dufour's gland in these bees.

An intriguing finding is the presence of venom acid phosphatase Acph-1 in the Dufour's gland of *A. mellifera* forager workers. This is an enzyme of bee venom [68, 82] that hydrolyzes phosphomonoesters at acidic pHs. The Acph-1 of bee venom is a potent allergen, triggering strong reactions in humans [83]. The presence of this protein in the Dufour's gland of forager workers might be due a possible contamination from the venom gland, but during the removal of the Dufour's gland there were no apparent disruptions of the venom reservoirs. Thus, this protein may have another function in these worker bees.

The chemical composition of Dufour's gland secretion in insects has been identified mainly by gas chromatography and mass spectrometry, as being composed for saturated or unsaturated long chain hydrocarbons, although other compounds may also occur in this gland [10, 24, 52, 53, 84–86]. The principal enzymes for the hydrocarbons biosynthesis are fatty acid synthases, elongases, desaturases, reductases and P450 decarboxylase [12, 87]. In the honey bee

*A. mellifera*, six desaturase and 10 elongases genes have been predicted with some of them expressed differentially in nurse and forager workers [88]. However, these hydrocarbon metabolism enzymes were not identified in this study, perhaps because as small they were not detected using a 2D gel/MALDI-TOF/TOF protocol or because we only analyzed those spots with significant difference in the two-dimensional electrophoresis suggesting that these enzymes are expressed equally in both the Dufour's gland of nurse and forager workers. This result suggests that further studies are necessary to identify the complete profile of proteins of the Dufour's gland of *A. mellifera*.

This is the first descriptive and comparative proteomic study to characterize proteins in the Dufour's gland of *A. mellifera*. Our results showed differences in the quantity and types of proteins in the Dufour's gland when nurse workers change to forager ones, suggesting that this gland has different roles according to bee age and social behavior. Despite its simple structural complexity, the Dufour's gland of bees seem to have a great functional complexity, since until now, its major role has been reported as the production of lipid other than proteins. This study can be useful for the comprehension of some molecular mechanisms triggered by the labor division in bees.

## Supporting information

**S1 Table. List of identified proteins spots in Dufour's gland of *Apis mellifera* workers with Image Master.** Up-regulated and down-regulated refer to proteins with higher and lower expression, respectively, in nurse worker in comparison with forager ones.  
(PDF)

## Acknowledgments

The authors thank the Núcleo de Análises de Biomoléculas of Universidade Federal de Viçosa, Brazil, and Biotechnology Core Facility of Kansas State University, USA for technical assistance.

## Author Contributions

**Conceptualization:** ADT JES.

**Data curation:** ADT PDG BBK.

**Formal analysis:** ADT PDG JMT JES.

**Funding acquisition:** JES JCZ.

**Investigation:** ADT PDG BBK.

**Project administration:** JES.

**Resources:** JES JCZ JMT.

**Supervision:** JES.

**Visualization:** ADT PDG JMT JCZ JES.

**Writing – original draft:** JCZ JMT JES.

**Writing – review & editing:** ADT JCZ JMT JES.

## References

1. Calderone NW. Insect pollinated crops, insect pollinators and US agriculture: trend analysis of aggregate data for the period 1992–2009. *PLoS One*. 2012; 7: 1–27.
2. Garibaldi LA., Carvalheiro LG, Vaissière BE, Gemmill-Herren B, Hipólito J, Freitas BM, et al. Mutually beneficial pollinator diversity and crop yield outcomes in small and large farms. *Science* 2016; 351: 388–91. <https://doi.org/10.1126/science.aac7287> PMID: 26798016
3. Michener CD. *The Social Behavior of Bees: a Comparative Study*. 1st ed. Cambridge: Harvard University Press; 1974.
4. Page RE. Protandrous reproduction in honey bees. *Environ Entomol*. 1980; 10: 359–62.
5. Winston ML. *The Biology of the Honey Bee*. 1st ed. Cambridge: Harvard University Press; 1987.
6. Lattorff HMG, Moritz RFA. Genetic underpinnings of division of labor in the honeybee (*Apis mellifera*). *Trends Genet*. 2013; 29: 641–8. <https://doi.org/10.1016/j.tig.2013.08.002> PMID: 24012355
7. Martin SJ, Dils V, Billen J. Morphology of the Dufour gland within the honey bee sting gland complex. *Apidologie*. 2005; 36: 543–6.
8. Cruz-Landim C. Glândulas tegumentares abdominais de abelhas. Ocorrência e ultra-estrutura. *Anais do Encontro sobre Abelhas 1996*; 2: 67–75 (Ribeirão Preto).
9. Grimaldi D, Engel MS. *Evolution of the Insects*. 1st ed. New York: Cambridge University Press; 2005.
10. Mitra A. Function of the Dufour's gland in solitary and social Hymenoptera. *J Hymenopt Res*. 2013; 35: 33–58.
11. Esteves FG, Santos-Pinto JR., Saidemberg DM, Palma MS. Using a proteometabolomic approach to investigate the role of Dufour's gland in pheromone biosynthesis in the social wasp *Polybia paulista*. *J Proteomics*. 2017; 151: 122–30. <https://doi.org/10.1016/j.jprot.2016.01.009> PMID: 26808590
12. Katzav-Gozansky T, Soroker V, Hefetz A. Honeybees Dufour's gland—idiosyncrasy of a new queen signal. *Apidologie*. 2002; 33: 525–37.
13. Malka O, Shnieor S, Katzav-Gozansky T, Hefetz A. Aggressive reproductive competition among hopelessly queenless honeybee workers triggered by pheromone signaling. *Naturwissenschaften*. 2008; 95: 553–9. <https://doi.org/10.1007/s00114-008-0358-z> PMID: 18320158
14. Bradford MM. A rapid and sensitive method for the quantitation of microgram quantities of protein utilizing the principle of protein-dye binding. *Anal Biochem*. 1976; 72: 248–54. PMID: 942051
15. Miura E, Kato Y, Matsushima R, Albrecht V, Laalami S, Sakamoto W. The balance between protein synthesis and degradation in chloroplasts determines leaf variegation in *Arabidopsis* yellow variegated mutants. *Plant Cell*. 2007; 19: 1313–28. <https://doi.org/10.1105/tpc.106.049270> PMID: 17416734
16. Hinault MP, Ben-Zvi A, Goloubinoff P. Chaperones and proteases: cellular fold-controlling factors of proteins in neurodegenerative diseases and aging. *J Mol Neurosci*. 2006; 30: 249–65. <https://doi.org/10.1385/JMN:30:3:249> PMID: 17401151
17. Coux O, Tanaka K, Goldberg AL. Structure and functions of the 20S and 26S proteasomes. *Annu Rev Biochem*. 1996; 65: 801–47. <https://doi.org/10.1146/annurev.bi.65.070196.004101> PMID: 8811196
18. Severson DW, Erickson EH Jr, Williamson JL, Aiken JM. Heat stress induced enhancement of heat shock protein gene activity in the honey bee (*Apis mellifera*). *Experientia*. 1990; 46: 737–9. PMID: 2373199
19. Scharlaken B, De Graaf DC, Memmi S, Devreese B, Van Beeumen J, Jacobs FJ. Differential protein expression in the honey bee head after a bacterial challenge. *Arch Insect Biochem Physiol*. 2007; 65: 223–37. <https://doi.org/10.1002/arch.20179> PMID: 17630657
20. Elekonich MM. Extreme thermotolerance and behavioral induction of 70-kDa heat shock proteins and their encoding genes in honey bees. *Cell Stress Chaperones*. 2009; 14: 219–26. <https://doi.org/10.1007/s12192-008-0063-z> PMID: 18696260
21. Fang Y, Feng M, Han B, Lu X, Ramadan H, Li J. In-depth proteomics characterization of embryogenesis of the honey bee worker (*Apis mellifera ligustica*). *Mol Cell Proteomics*. 2014; 13: 2306–20. <https://doi.org/10.1074/mcp.M114.037846> PMID: 24895377
22. Kucharski R, Maleszka R. Evaluation of differential gene expression during behavioral development in the honeybee using microarrays and northern blots. *Genome Biol*. 2002; 3: 1–9.
23. Garcia L, Saraiva Garcia CH, Calábria LK, Costa Nunes da Cruz G, Sánchez Puentes A, Bão SN et al. Proteomic analysis of honey bee brain upon ontogenetic and behavioral development. *J Proteome Res*. 2009; 8: 1464–73. <https://doi.org/10.1021/pr800823r> PMID: 19203288
24. Abdalla FC, Jones GR, Morgan D, Cruz-Landim C. Chemical composition of the Dufour gland secretion in queens of *Melipona bicolor* (Hymenoptera, Meliponini). *J Braz Chem Soc*. 2004; 15: 621–5.

25. Abdalla FC, Cruz-Landim C. A comparative cytochemical study of the Dufour gland in the eusocial bees *Apis mellifera* Linné, 1758 and *Melipona bicolor* Lepeletier, 1836. *Acta histochem cytochem*. 2004; 37: 65–71.
26. Katzav-Gozansky T, Soroker V, Hefetz A. Plasticity in caste-related exocrine secretion biosynthesis in the honey bee (*Apis mellifera*). *J Insect Physiol*. 2000; 46: 993–9. PMID: [10802112](#)
27. Katzav-Gozansky T, Hefetz A, Soroker V. Brain modulation of Dufour's gland ester biosynthesis in vitro in the honeybee (*Apis mellifera*). *Naturwissenschaften*. 2007; 94: 407–11. <https://doi.org/10.1007/s00114-006-0206-y> PMID: [17235597](#)
28. Martin SJ, Jones GR. Conservation of bio synthetic pheromone pathways in honeybees *Apis*. *Naturwissenschaften*. 2004; 91: 232–6. <https://doi.org/10.1007/s00114-004-0517-9> PMID: [15146271](#)
29. Richard FJ, Schal C, Tarp DR, Grozinger CM. Effects of instrumental insemination and insemination quantity on Dufour's gland chemical profiles and vitellogenin expression in honey bee queens (*Apis mellifera*). *J Chem Ecol*. 2011; 37: 1027–36. <https://doi.org/10.1007/s10886-011-9999-z> PMID: [21786084](#)
30. Boiteux A, Hess B. Design of glycolysis. *Phil Trans R Soc B*. 1981; 293: 5–22. PMID: [6115423](#)
31. Nelson DL, Cox MM. *Princípios de Bioquímica de Lehninger*. 6th ed. Porto Alegre: Artmed; 2014.
32. Blatt J, Roces F. Hemolymph sugar levels in foraging honeybees (*Apis mellifera carnica*): Dependence on metabolic rate and *in vivo* measurement of maximal rates of trehalose synthesis. *J Exp Biol*. 2001; 204: 2709–16. PMID: [11533121](#)
33. Gmeinbauer R, Craisheim C. Glucose utilization during flight of honeybee (*Apis mellifera*) workers, drone and queens. *J Insect Physiol*. 1993; 39: 959–67.
34. Arakane Y, Muthukrishnan S. Insect chitinase and chitinase-like proteins. *Cell Mol Life Sci*. 2009; 67: 201–16. <https://doi.org/10.1007/s00018-009-0161-9> PMID: [19816755](#)
35. Li J, Feng M, Begna D, Yu F, Aijuan Z. Proteome comparison of hypopharyngeal gland development between Italian and royal jelly producing worker honeybees (*Apis mellifera* L.). *J Proteome Res*. 2010; 9: 6578–94. <https://doi.org/10.1021/pr100768t> PMID: [20882974](#)
36. Li J, Wu J, Rundassa DB, Song F, Zheng A, Fang Y. Differential protein expression in honeybee (*Apis mellifera* L.) larvae: underlying caste differentiation. *PLoS One*. 2010; 5 (10): e13455. <https://doi.org/10.1371/journal.pone.0013455> PMID: [20975997](#)
37. Erban T, Petrova D, Harant K, Jedelsky PL, Titera D. Two-dimensional gel proteome analysis of honeybee, *Apis mellifera*, worker red-eye pupa hemolymph. *Apidologie*. 2014; 45: 53–72.
38. Abdalla FC, Cruz-Landim C. Changes in the morphology of the Dufour gland of *Apis mellifera* L. (Hymenoptera: Apidae) during the life stages of the female castes. *Rev Bras Entomol*. 2001; 45: 123–9.
39. Doumen C, Ellington WR. Mitochondrial arginine kinase from the heart of the horseshoe crab, *Limulus polyphemus*. *J Comp Physiol B*. 1990; 160: 449–57.
40. Munneke LR, Collier GE. Cytoplasmic and mitochondrial arginine kinases in *Drosophila*: evidence for a single gene. *Biochem Genet*. 1988; 26: 131–41. PMID: [2837172](#)
41. Chen X, Yao P, Chu X, Hao L, Guo X, Xu B. Isolation of arginine kinase from *Apis cerana cerana* and its possible involvement in response to adverse stress. *Cell Stress Chaperones*. 2015; 20: 169–83. <https://doi.org/10.1007/s12192-014-0535-2> PMID: [25135575](#)
42. Fruttero LL, Demartini DR, Rubiolo ER, Carlini CR, Canavoso LE.  $\beta$ -chain of ATP synthase as a lipophorin binding protein and its role in lipid transfer in the midgut of *Panstrongylus megistus* (Hemiptera: Reduviidae). *Insect Biochem Mol Biol*. 2014; 52: 1–12. <https://doi.org/10.1016/j.ibmb.2014.06.002> PMID: [24952172](#)
43. Van der Horst DJ, Roosendaal SD, Rodenburg KW. Circulatory lipid transport: lipoprotein assembly and function from an evolutionary perspective. *Mol Cell Biochem*. 2009; 326: 105–19. <https://doi.org/10.1007/s11010-008-0011-3> PMID: [19130182](#)
44. Hampton RY. ER-associated degradation in protein quality control and cellular regulation. *Curr Opin Cell Biol*. 2002; 14: 476–82. PMID: [12383799](#)
45. Meusser B, Hirsch C, Jarosch E, Sommer T. ERAD: the long road to destruction. *Nat Cell Biol*. 2005; 7: 766–772. <https://doi.org/10.1038/ncb0805-766> PMID: [16056268](#)
46. Chan QWT, Howes CG, Foster LJ. Quantitative comparison of caste differences in honeybee hemolymph. *Mol Cell Proteomics*. 2006; 5: 2252–62. <https://doi.org/10.1074/mcp.M600197-MCP200> PMID: [16920818](#)
47. Hrasnigg N, Leonhard B, Crailsheim K. Free amino acids in the haemolymph of honey bee queens (*Apis mellifera* L.). *Amino Acids*. 2003; 24: 205–12. PMID: [12624754](#)
48. Abdalla FC, Velthuis H, Cruz-Landim C, Duchateau MJ. Changes in the morphology and ultrastructure of the Dufour's gland during the life cycle of the bumble bee queen, *Bombus terrestris* L. (Hymenoptera: Bombini). *Neth J Zool*. 1999; 49: 251–61.

49. Abdalla FC, Velthuis H, Duchateau MJ, Cruz-Landim C. Secretory cycle of the Dufour's gland in workers of bumble bee *Bombus terrestris* (Hymenoptera: Bombini). *Neth J Zool.* 1999; 49: 139–56.
50. Abdalla FC, Cruz-Landim C. Occurrence, morphology and ultrastructure of the Dufour gland in *Melipona bicolor* Lepeletier, 1836 (Hymenoptera: Meliponini). *Rev Bras Entomol.* 2004; 48: 1–19.
51. Barrows EM, Chapman GB, Zenel JE, Blake AS. Ultrastructure of Dufour's glands in active and inactive horn-faced bees, *Osmia cornifrons* (Hymenoptera: Megachilidae). *J Kans Entomol Soc.* 1986; 59: 480–93.
52. Abdalla FC, Cruz-Landim C. Changes in the morphology of the Dufour gland of *Apis mellifera* L. (Hymenoptera: Apidae) during the life stages of the female castes. *Rev Bras Entomol.* 2001; 45: 123–9.
53. Doumen C, Ellington WR. Mitochondrial arginine kinase from the heart of the horseshoe crab, *Limulus polyphemus*. *J Comp Physiol B.* 1990; 160: 449–57.
54. Roat TC, dos Santos-Pinto JR, Dos Santos LD, Santos KS, Malaspina O, Palma MS. Modification of the brain proteome of Africanized honeybees (*Apis mellifera*) exposed to a sub-lethal doses of the insecticide fipronil. *Ecotoxicol.* 2014; 23: 1659–70.
55. Krishna SH, Karanth NG. Lipases and lipase-catalyzed esterification reactions in non-aqueous media. *Cat Rev.* 2002; 44: 499–591.
56. Mingarro I, Pérez-Payá E, Pinilla C, Appel JR, Houghten RA, Blondelle SE. Activation of bee venom phospholipase A2 through a peptide-enzyme complex. *FEBS Lett.* 1995; 372: 131–4. PMID: [7556634](https://pubmed.ncbi.nlm.nih.gov/7556634/)
57. Katzav-Gozansky T, Soroker V, Francke W, Hefetz A. Honeybee egg-laying workers mimic a queen signal. *Insectes Soc.* 2003; 50: 20–3.
58. Katzav-Gozansky T, Boulay R, Soroker V, Hefetz A. Queen-signal modulation of worker pheromonal composition in honeybees. *Proc R Soc London Ser B.* 2004; 271: 2065–9.
59. Abdalla FC. Morphological, chemical and developmental aspects of the Dufour gland in some eusocial bees (Hymenoptera: Apidae): a review. *Rev Bras Entomol.* 2006; 50: 153–62.
60. Pickett JA, Williams IH, Martin AP. (Z)-11-eicosen-1-ol, an important new pheromonal component from the sting of the honey bee *Apis mellifera* (Hymenoptera, Apidae). *J Chem Ecol.* 1982; 8: 163–75. <https://doi.org/10.1007/BF00984013> PMID: [24414592](https://pubmed.ncbi.nlm.nih.gov/24414592/)
61. Tan K, Wang Y, Dong S, Liu X, Zhuang D, Chen W, et al. Associations between reproduction and work in workers of the Asian hive bee *Apis cerana*. *J Insect Physiol.* 2015; 82: 33–7. <https://doi.org/10.1016/j.jinsphys.2015.08.003> PMID: [26276684](https://pubmed.ncbi.nlm.nih.gov/26276684/)
62. Woyciechowski M, Kuszewska K. Swarming generates rebel workers in honeybees. *Curr Biol.* 2012; 22: 707–11. <https://doi.org/10.1016/j.cub.2012.02.063> PMID: [22464193](https://pubmed.ncbi.nlm.nih.gov/22464193/)
63. Yao P, Lu W, Meng F, Wang X, Xu B, Guo X. Molecular cloning, expression and oxidative stress response of a mitochondrial thioredoxin peroxidase gene (AccTpx-3) from *Apis cerana cerana*. *J Insect Physiol.* 2013; 59: 273–82. <https://doi.org/10.1016/j.jinsphys.2012.11.005> PMID: [23220190](https://pubmed.ncbi.nlm.nih.gov/23220190/)
64. Yao P, Chen X, Yan Y, Liu F, Zhang Y, Guo X, et al. Glutaredoxin 1, glutaredoxin 2, thioredoxin 1, and thioredoxin peroxidase 3 play important roles in antioxidant defense in *Apis cerana cerana*. *Free Radic Biol Med.* 2014; 68: 335–46. <https://doi.org/10.1016/j.freeradbiomed.2013.12.020> PMID: [24389255](https://pubmed.ncbi.nlm.nih.gov/24389255/)
65. Enayati AA, Ranson H, Hemingway J. Insect glutathione transferases and insecticide resistance. *Insect Mol Biol.* 2005; 14: 3–8. <https://doi.org/10.1111/j.1365-2583.2004.00529.x> PMID: [15663770](https://pubmed.ncbi.nlm.nih.gov/15663770/)
66. Konus M, Koy C, Mikkat S, Kreutzer M, Zimmermann R, Iscan M, et al. Molecular adaptations of *Helicoverpa armigera* midgut tissue under pyrethroid insecticide stress characterized by differential proteome analysis and enzyme activity assays. *Comp Biochem Physiol Part D Genomics Proteomics.* 2013; 8: 152–62. <https://doi.org/10.1016/j.cbd.2013.04.001> PMID: [23685472](https://pubmed.ncbi.nlm.nih.gov/23685472/)
67. Yan H, Jia H, Gao H, Guo X, Xu B. Identification, genomic organization, and oxidative stress response of a sigma class glutathione S-transferase gene (AccGSTS1) in the honey bee, *Apis cerana cerana*. *Cell Stress Chaperones.* 2013; 18: 415–26. <https://doi.org/10.1007/s12192-012-0394-7> PMID: [23250585](https://pubmed.ncbi.nlm.nih.gov/23250585/)
68. Peiren N, de Graaf DC, Vanrobaeys F, Danneels EL, Devreese B, Van Beeumen J, et al. Proteomic analysis of the honey bee worker venom gland focusing on the mechanisms of protection against tissue damage. *Toxicon.* 2008; 52: 72–83. <https://doi.org/10.1016/j.toxicon.2008.05.003> PMID: [18573272](https://pubmed.ncbi.nlm.nih.gov/18573272/)
69. Alberts B, Johnson A, Lewis J, Raff M, Roberts K, Walter P. *Molecular Biology of the Cell.* 5th ed. New York: Garland Science; 2015.
70. Zhou G, Kohlhepp P, Geiser D, Frasniquillo Mdel C, Vazquez-Moreno L, Winzerling JJ. Fate of blood meal iron in mosquitoes. *J Insect Physiol.* 2007; 53: 1169–78. PMID: [17689557](https://pubmed.ncbi.nlm.nih.gov/17689557/)
71. Dunkov B, Georgieva T. Insect iron binding proteins: insights from the genomes. *Insect Biochem Mol Biol.* 2006; 36: 300–9. <https://doi.org/10.1016/j.ibmb.2006.01.007> PMID: [16551544](https://pubmed.ncbi.nlm.nih.gov/16551544/)
72. Nichol H, Locke M. The localization of ferritin in insects. *Tissue Cell.* 1990; 2: 767–77.

73. Vogt RG, Riddiford LM. Pheromone binding and inactivation by moth antennae. *Nature*. 1981; 293: 161–3. PMID: [18074618](#)
74. Forêt S, Maleszka R. Function and evolution of a gene family encoding odorant binding-like proteins in a social insect, the honey bee (*Apis mellifera*). *Genome Res*. 2006; 16: 1404–13. <https://doi.org/10.1101/gr.5075706> PMID: [17065610](#)
75. Schwaighofer A, Pechlaner M, Oostenbrink C, Kotlowski C, Araman C, Mastrogiamco R, et al. Insights into structural features determining odorant affinities to honey bee odorant binding protein 14. *Biochem Biophys Res Commun*. 2014; 446: 1042–46. <https://doi.org/10.1016/j.bbrc.2014.03.054> PMID: [24661875](#)
76. Horst R, Damberger F, Luginbühl P, Güntert P, Peng G, Nikonova L, et al. NMR structure reveals intramolecular regulation mechanism for pheromone binding and release. *Proc Natl Acad Sci USA*. 2001; 98: 14374–79. <https://doi.org/10.1073/pnas.251532998> PMID: [11724947](#)
77. Pelosi P, Calvello M, Ban L. Diversity of odorant-binding proteins and chemosensory proteins in insects. *Chem Senses*. 2005; 30 Suppl 1: i291–2.
78. Zheng A, Li J, Begna D, Fang Y, Feng M, Song F. Proteomic analysis of honeybee (*Apis mellifera* L.) pupae head development. *PLoS One*. 2011; 6: e20428. <https://doi.org/10.1371/journal.pone.0020428> PMID: [21637821](#)
79. Iovinella I, Dani FR, Niccolini A, Sagona S, Michelucci E, Gazzano A, et al. Differential expression of odorant-binding proteins in the mandibular glands of the honey bee according to caste and age. *J Proteome Res*. 2011; 10: 3439–49. <https://doi.org/10.1021/pr2000754> PMID: [21707107](#)
80. Elias-Santos D, Fialho MCQ, Vitorino R, Oliveira LL, Zanuncio JC, Serrão JE. Proteome of the head and thorax salivary glands in the stingless bee *Melipona quadrifasciata anthidioides*. *Apidologie*. 2013; 44: 684–98.
81. Wolschin F, Amdam GV. Plasticity and robustness of protein patterns during reversible development in the honey bee (*Apis mellifera*). *Anal Bioanal Chem*. 2007; 389: 1095–100. <https://doi.org/10.1007/s00216-007-1523-5> PMID: [17805521](#)
82. Kim BY, Jin BR. Molecular characterization of a venom acid phosphatase AcpH-1-like protein from the Asiatic honeybee *Apis cerana*. *J Asia Pac Entomol*. 2014; 17: 695–700.
83. Grunwald T, Bockisch B, Spillner E, Ring J, Bredehorst R, Ollert MW. Molecular cloning and expression in insect cells of honeybee venom allergen acid phosphatase (Api m 3). *J Allergy Clin Immunol*. 2006; 117: 848–54.
84. Amsalem E, Twele R, Francke W, Hefetz A. Reproductive competition in the bumblebee *Bombus terrestris*: do workers advertise sterility? *Proc R Soc B*. 2009; 276: 1295–304. <https://doi.org/10.1098/rspb.2008.1688> PMID: [19129137](#)
85. Bonckaert W, Drijfout FP, D'Ettorre P, Billen J, Wenseelers T. Hydrocarbon signatures of egg maternity, caste membership and reproductive status in the common wasp. *J Chem Ecol*. 2012; 38: 42–51. <https://doi.org/10.1007/s10886-011-0055-9> PMID: [22234429](#)
86. Mitra A, Saha P, Chaoulideer ME, Bhadra A, Gadagkar R. Chemical communication in *Ropalidia marginata*: Dufour's gland contains queen signal that is perceived across colonies and does not contain colony signal. *J Insect Physiol*. 2011; 57: 280–4. <https://doi.org/10.1016/j.jinsphys.2010.11.014> PMID: [21112330](#)
87. Blomquist G, Jurenka R, Schal C, Tittiger C. Pheromone Production: Biochemistry and Molecular Biology. In Gilbert LI, editor. *Insect Endocrinology*. London: Academic Press-Elsevier; 2012. pp 523–67.
88. Falcón T, Ferreira-Caliman MJ, Franco Nunes FM, Tanaka ED, do Nascimento FS, Gentile Bitondi MM. Exoskeleton formation in *Apis mellifera*: Cuticular hydrocarbons profiles and expression of desaturase and elongase genes during pupal and adult development. *Insect Biochem Mol Biol*. 2014; 50: 68–81. <https://doi.org/10.1016/j.ibmb.2014.04.006> PMID: [24813723](#)
